# Supplementary material for: Thermodynamics and kinetics of Mg2+/Li+ and Mg2+/Na+ co-intercalation into layered titanium disulfide
Source: Royal Society of Chemistry journal article supplement (doi:10.1039/d3cp01531a), 2023-01-01
Supplement: d3cp01531a1.pdf [file d3cp01531a1.pdf]

## Supplementary information

### Thermodynamics and kinetics of $\text{Mg}^{2+}/\text{Li}^+$ and $\text{Mg}^{2+}/\text{Na}^+$ co-intercalation into layered titanium disulfide

Yudi Tang<sup>a</sup>, Donggang Tao<sup>a</sup>, Yuliang Cao<sup>b</sup>, Fei Xu<sup>\*a</sup>

<sup>a</sup> Key Laboratory of Hydraulic Machinery Transients, Ministry of Education, School of Power and Mechanical Engineering, Wuhan University, Wuhan 430072, China.

<sup>b</sup> Hubei Key Lab of Electrochemical Power Sources, College of Chemistry & Molecular Science, Wuhan University, Wuhan 430072, China.

\* E-mail: Fei Xu (xufei2058@whu.edu.cn)

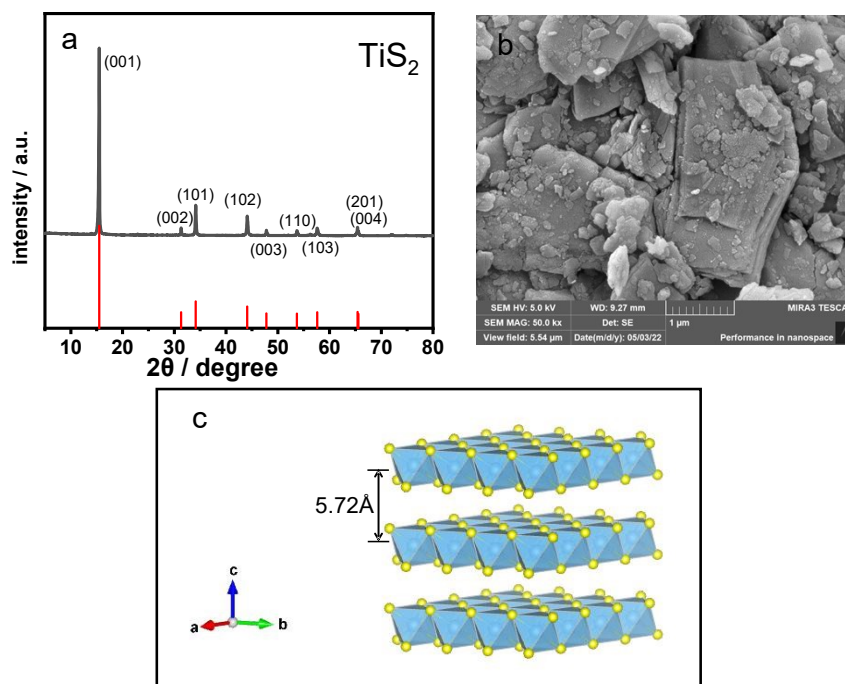

**Fig. S1** (a) XRD pattern, (b) SEM image and (c) crystal structure of  $\text{TiS}_2$ . The  $\text{TiS}_2$  layer consists of two layers of S atoms, in which Ti atoms occupy the octahedral positions. The  $\text{TiS}_2$  layers form a 2D layered structure connected by van der Waals forces, and the  $c$  parameter is 5.72 Å (Fig. S1c). The characteristic XRD peak at  $15.7^\circ$  is ascribed to the (001) plane.

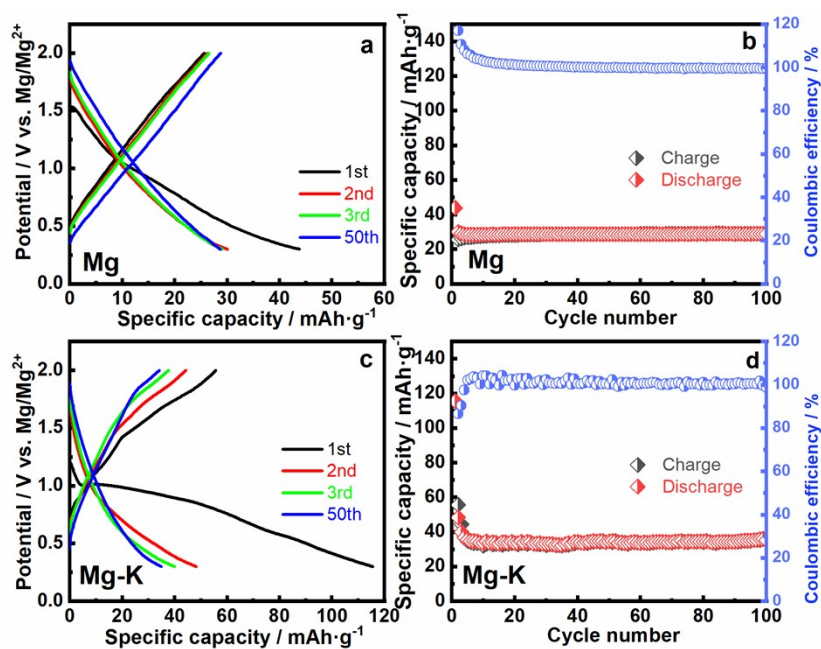

**Fig. S2** (a) Charge/discharge profiles and (b) cycling performance at  $50 \text{ mA g}^{-1}$  of the Mg battery. (c) Charge/discharge profiles and (d) cycling performance at  $50 \text{ mA g}^{-1}$  of the  $\text{Mg}^{2+}/\text{K}^+$  battery.

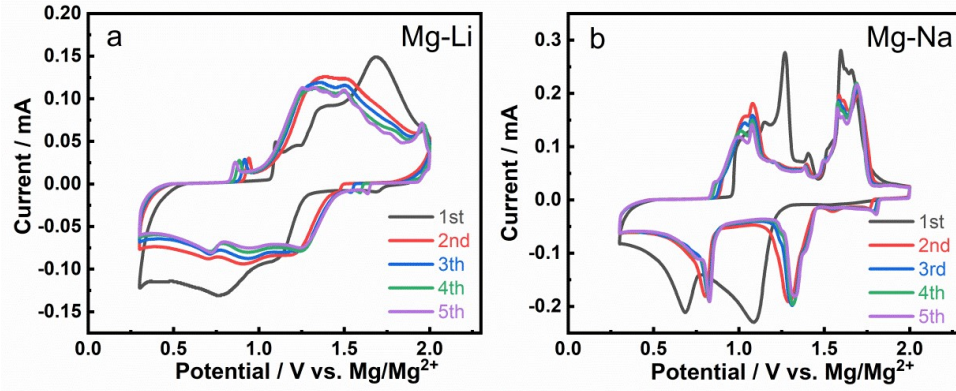

**Fig. S3** CV profiles at  $0.1 \text{ mV s}^{-1}$  of  $\text{TiS}_2$  in (a)  $\text{Mg}^{2+}/\text{Li}^+$  and (b)  $\text{Mg}^{2+}/\text{Na}^+$  electrolytes. The difference of the CV curves between the first cycle and the subsequent cycles might be owing to the formation of SEI on the  $\text{TiS}_2$  cathode or Mg anode.

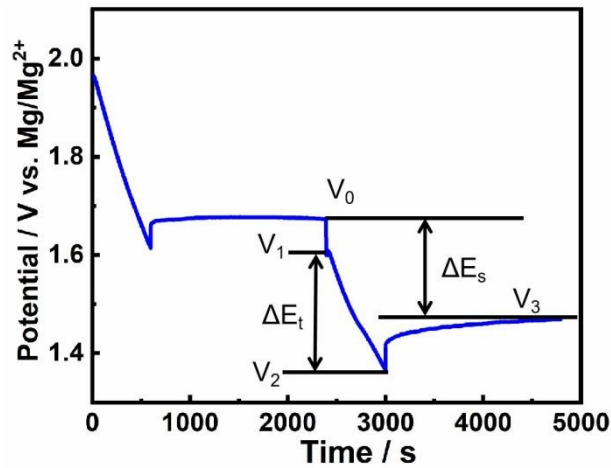

**Fig. S4** GITT calculation details.

$$D = \frac{4}{\pi\tau} \left( \frac{n_m V_m}{S} \right)^2 \left( \frac{\Delta E_s}{\Delta E_t} \right)^2$$

$\tau$  (=600 s) — the duration of the current pulse;

$n_m$  (mol) — the number of moles;

$V_m$  (=33.19  $\text{cm}^3/\text{mol}$ ) — the molar volume of the electrode;

$S$  (=1.131  $\text{cm}^2$ ) — the electrode area;

$\Delta E_s$  (V) — the steady-state voltage change,

$\Delta E_t$  (V) — the voltage change during the constant current pulse, eliminating the  $iR$  drop.

**Table S1.** Calculation details for formation energies ( $\Delta E$ ) of different intercalation structures.

| Reference system | $E(\text{total})$ | multiple | $E(\text{everge})$ |  |  |  |  |
|------------------|-------------------|----------|--------------------|--|--|--|--|
| TiS <sub>2</sub> | -19.776           | 1.0000   | -19.776            |  |  |  |  |
| Na               | -2.6109           | 2.0000   | -1.3054            |  |  |  |  |
| Mg               | -2.9979           | 2.0000   | -1.4990            |  |  |  |  |
| Li               | -3.8032           | 2.0000   | -1.9016            |  |  |  |  |

  

|                                                             | $E(\text{total})$ | Na     | Mg     | Li     | TiS <sub>2</sub> | $\Delta E(\text{eV})$ |
|-------------------------------------------------------------|-------------------|--------|--------|--------|------------------|-----------------------|
| NaMg <sub>0.5</sub> (TiS <sub>2</sub> ) <sub>2</sub> -case1 | -88.146           | 2.0000 | 1.0000 | 0.0000 | 4.0000           | -1.6442               |
| NaMg <sub>0.5</sub> (TiS <sub>2</sub> ) <sub>2</sub> -case2 | -176.31           | 4.0000 | 2.0000 | 0.0000 | 8.0000           | -1.6465               |
| LiMg <sub>0.5</sub> (TiS <sub>2</sub> ) <sub>2</sub> -case1 | -90.276           | 0.0000 | 1.0000 | 2.0000 | 4.0000           | -1.9569               |
| LiMg <sub>0.5</sub> (TiS <sub>2</sub> ) <sub>2</sub> -case2 | -180.56           | 0.0000 | 2.0000 | 4.0000 | 8.0000           | -1.9582               |
| LiTiS <sub>2</sub>                                          | -23.598           | 0.0000 | 0.0000 | 1.0000 | 1.0000           | -1.9210               |
| Na <sub>3</sub> (TiS <sub>2</sub> ) <sub>10</sub>           | -415.57           | 6.0000 | 0.0000 | 0.0000 | 20.0000          | -2.0376               |
| Mg(TiS <sub>2</sub> ) <sub>2</sub>                          | -254.36           | 0.0000 | 6.0000 | 0.0000 | 12.0000          | -1.3426               |

$$\Delta E = [E(\text{total}) - xE(\text{TiS}_2) - yE(\text{Li}) - zE(\text{Mg}) - mE(\text{Na})]/(y + z + m)$$

The reference frame locates TiS<sub>2</sub>, Li-bulk Na-bulk Mg-bulk, and we can calculate the energy of E(TiS<sub>2</sub>), E(Li), E(Mg) and E(Na). Therefore, by calculating the average formation energy of each structure, the difficulty of formation could be estimated. The more negative the formation energy value, the easier it is to form. The formation energy for different intercalation structures can be described as:

$$\Delta E = [E(\text{total}) - xE(\text{TiS}_2) - yE(\text{Li}) - zE(\text{Mg}) - mE(\text{Na})]/(y + z + m)$$

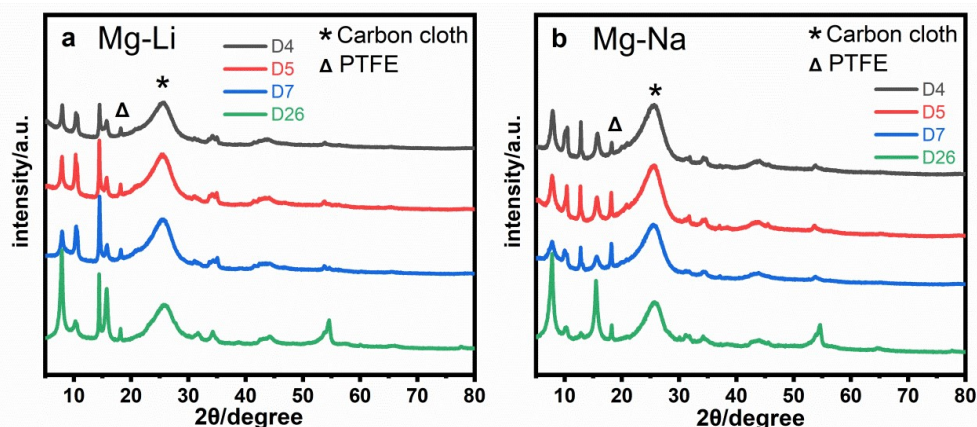

**Fig. S5** Ex-situ XRD patterns of the discharged cathodes in (a) Mg<sup>2+</sup>/Li<sup>+</sup> and (b) Mg<sup>2+</sup>/Na<sup>+</sup> batteries at different cycles (50 mA g<sup>-1</sup>).

## References

- [1] Z. Song, Z. Zhang, A. Du, S. Dong, G. Li and G. Cui, *Adv. Mater.*, 2021, 33, 2100224.
- [2] Z. Song, Z. Zhang, A. Du, S. Dong, G. Li and G. Cui, *J. Energy Chem.*, 2020, 48, 299-307.
